# Supplementary material for: Brucellosis in ruminants and pastoralists in Borena, Southern Ethiopia
Source: PLOS journal article supplement (doi:10.1371/journal.pntd.0008461), 2020-07-24
Supplement: S2 (10.1371/journal.pntd.0008461.s002) [file journal.pntd.0008461.s002]

**Addis Ababa University  
Aklilu Lemma Institute of Pathobiology  
Institutional Review Board**

**Protocol amendment Approval Sheet**

**Minute No. ALIPB/IRB/004/2017/18**

**Date: 05 Thursday January, 2018**

Title of the Project: **'Epidemiology of Brucellosis and Its Public Health Significance in Urban and Periurban Dairy Production System in Addis Ababa and selected districts of Borena Pastoral zone, Ethiopia'**

**PI: Bedaso Mammo**

**Recommendation of the ALIPB Institutional Review Board**

The PhD proposal was approved by ALIPB IRB (Minutes Ref No.: ALIPB/IRB/011/2015/16, Date 8<sup>th</sup> November 2016). The student requested protocol amendment pertaining to study sites with plausible justification. The ALIPB IRB discussed the importance of the requested protocol amendment. The Institutional Review Board reminds the student to submit progress reports of the work every 6 months and the final report upon completion of the study. Furthermore, the student should also notify the ALIPB/IRB ahead of time any amendments or modifications in the protocol or premature suspension or termination of the study

**STATUS: APPROVED**

**IRB Chairperson: Dr. Tilahun Teklehaymanot**

Signature: \_\_\_\_\_

*Tilahun Teklehaymanot*  
15/01/2018  
Approval

**IRB Secretary: Dr Lemtu Golassa**

Signature: \_\_\_\_\_

*Lemtu Golassa*  
05/01/18

Name: Dr Mirutse Giday, Director

Signature: \_\_\_\_\_

Date: \_\_\_\_\_

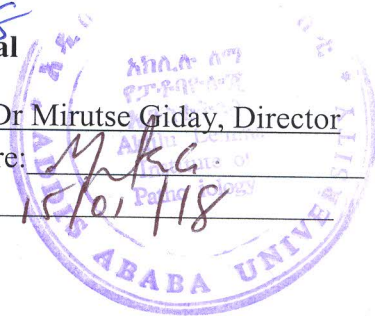

CC/

Bedaso Mammo , ALIPB  
Director's Office, ALIPB  
ALIPB/IRB office
